# Supplementary material
Source: MDPI journal article supplement (https://www.mdpi.com/2077-0472/12/5/602)
Supplement: s1 [file s1]

Select specific variables and compute statistics by levels of a factor variable for environment factor

| Environment | Variable | CV   | Max  | Mean | Median | Min  | Sd.amo | SE   | CI   |
|-------------|----------|------|------|------|--------|------|--------|------|------|
| BT18        | EL       | 7.05 | 19.6 | 16.7 | 16.8   | 14.2 | 1.18   | 0.16 | 0.31 |
| BT18        | GY       | 9.5  | 11.2 | 9.43 | 9.44   | 7.41 | 0.90   | 0.12 | 0.24 |
| BT18        | HSW      | 11.4 | 43.5 | 34.8 | 35     | 24.8 | 3.95   | 0.52 | 1.05 |
| BT19        | EL       | 7.2  | 20.3 | 16.8 | 16.9   | 14.2 | 1.21   | 0.16 | 0.32 |
| BT19        | GY       | 9.51 | 10.1 | 8.45 | 8.46   | 6.64 | 0.80   | 0.11 | 0.21 |
| BT19        | HSW      | 11.6 | 47.4 | 37.1 | 36.6   | 27.2 | 4.29   | 0.57 | 1.14 |
| FC18        | EL       | 7.72 | 22.2 | 18.5 | 18.4   | 16.2 | 1.43   | 0.19 | 0.38 |
| FC18        | GY       | 9.75 | 16.1 | 13   | 13     | 10.4 | 1.27   | 0.17 | 0.34 |
| FC18        | HSW      | 12.7 | 51.6 | 40.7 | 40.8   | 29.8 | 5.15   | 0.68 | 1.37 |
| FC19        | EL       | 8.14 | 21.4 | 18.4 | 18     | 15.6 | 1.49   | 0.20 | 0.40 |
| FC19        | GY       | 11.7 | 17.6 | 13.5 | 13.3   | 10.6 | 1.59   | 0.21 | 0.42 |
| FC19        | HSW      | 13.6 | 56.5 | 43.5 | 43.2   | 32.6 | 5.90   | 0.78 | 1.56 |
| FP18        | EL       | 6.89 | 20.6 | 18.3 | 18.5   | 15.9 | 1.26   | 0.17 | 0.34 |
| FP18        | GY       | 10.3 | 13.2 | 10.8 | 10.9   | 8.11 | 1.11   | 0.15 | 0.29 |
| FP18        | HSW      | 14.2 | 43   | 34   | 34.4   | 23   | 4.81   | 0.64 | 1.28 |
| FP19        | EL       | 7.59 | 21   | 18.2 | 18.5   | 15.3 | 1.38   | 0.18 | 0.37 |
| FP19        | GY       | 12.7 | 14.4 | 11.2 | 11.1   | 7.85 | 1.42   | 0.19 | 0.38 |
| FP19        | HSW      | 15.1 | 47.1 | 36.3 | 36.3   | 25.2 | 5.49   | 0.73 | 1.46 |
| FX18        | EL       | 5.06 | 21.7 | 18.9 | 18.9   | 17.4 | 0.96   | 0.13 | 0.25 |
| FX18        | GY       | 10.3 | 13.3 | 10.6 | 10.6   | 8.18 | 1.09   | 0.15 | 0.29 |
| FX18        | HSW      | 15.6 | 46.3 | 34.1 | 34.4   | 24   | 5.31   | 0.70 | 1.41 |
| FX19        | EL       | 7.34 | 23.2 | 18.8 | 18.6   | 16.8 | 1.38   | 0.18 | 0.37 |
| FX19        | GY       | 10.3 | 13.8 | 11.1 | 11     | 8.53 | 1.14   | 0.15 | 0.30 |
| FX19        | HSW      | 17   | 50.4 | 36.4 | 36.7   | 25   | 6.20   | 0.82 | 1.64 |
| GC18        | EL       | 7.28 | 21.9 | 18.5 | 18.2   | 15.7 | 1.34   | 0.18 | 0.36 |
| GC18        | GY       | 9.13 | 11.3 | 9.35 | 9.27   | 7.83 | 0.85   | 0.11 | 0.23 |
| GC18        | HSW      | 8.24 | 39.8 | 34.5 | 34.6   | 26.3 | 2.84   | 0.38 | 0.75 |
| GC19        | EL       | 7.6  | 22.3 | 18.6 | 18.3   | 15.9 | 1.41   | 0.19 | 0.38 |
| GC19        | GY       | 11.3 | 12.2 | 9.69 | 9.64   | 7.56 | 1.10   | 0.15 | 0.29 |
| GC19        | HSW      | 10.7 | 43.6 | 36.9 | 37     | 28.4 | 3.94   | 0.52 | 1.05 |
| GX18        | EL       | 11.1 | 22.5 | 18.5 | 18.4   | 14.3 | 2.07   | 0.27 | 0.55 |
| GX18        | GY       | 16   | 13.5 | 10.6 | 10.8   | 6.18 | 1.68   | 0.22 | 0.45 |
| GX18        | HSW      | 13.4 | 38.8 | 31.2 | 31.8   | 20.9 | 4.16   | 0.55 | 1.10 |
| GX19        | EL       | 11.3 | 22.5 | 18.4 | 17.8   | 14.5 | 2.08   | 0.28 | 0.55 |
| GX19        | GY       | 17.3 | 14.8 | 10.9 | 11.2   | 6.29 | 1.89   | 0.25 | 0.50 |
| GX19        | HSW      | 14.9 | 42.4 | 33.3 | 34.3   | 22.9 | 4.97   | 0.66 | 1.32 |
| HD18        | EL       | 8.87 | 21.8 | 17.4 | 17.4   | 14.3 | 1.55   | 0.21 | 0.41 |
| HD18        | GY       | 11.5 | 10.7 | 8.84 | 8.94   | 6.31 | 1.02   | 0.14 | 0.27 |
| HD18        | HSW      | 9.57 | 40.1 | 32.1 | 32.2   | 25.2 | 3.07   | 0.41 | 0.82 |
| HD19        | EL       | 9.63 | 22.3 | 17.6 | 17.6   | 14.2 | 1.69   | 0.22 | 0.45 |
| HD19        | GY       | 12.6 | 11.7 | 9.15 | 9.05   | 6.42 | 1.15   | 0.15 | 0.31 |
| HD19        | HSW      | 12   | 43.9 | 34.4 | 34.3   | 25.7 | 4.11   | 0.54 | 1.09 |
| HT18        | EL       | 9.33 | 21.5 | 18.3 | 18.1   | 14.9 | 1.70   | 0.23 | 0.45 |
| HT18        | GY       | 8.69 | 15.2 | 12.7 | 12.7   | 10.3 | 1.10   | 0.15 | 0.29 |
| HT18        | HSW      | 11.8 | 41.2 | 34.4 | 34.4   | 24.4 | 4.06   | 0.54 | 1.08 |
| HT19        | EL       | 9.39 | 21.8 | 18.1 | 18     | 15.1 | 1.70   | 0.23 | 0.45 |
| HT19        | GY       | 8.7  | 16.8 | 14   | 14     | 11.4 | 1.22   | 0.16 | 0.32 |
| HT19        | HSW      | 13.1 | 45.1 | 36.7 | 36.9   | 26.4 | 4.81   | 0.64 | 1.28 |
| HX18        | EL       | 8.75 | 21.3 | 18   | 18.3   | 14.2 | 1.57   | 0.21 | 0.42 |
| HX18        | GY       | 12.1 | 14.1 | 11.5 | 11.7   | 6.99 | 1.39   | 0.18 | 0.37 |
| HX18        | HSW      | 10.8 | 44.2 | 34.7 | 34.7   | 24.6 | 3.75   | 0.50 | 1.00 |
| HX19        | EL       | 10   | 22.1 | 17.8 | 18     | 14.7 | 1.78   | 0.24 | 0.47 |
| HX19        | GY       | 12.3 | 15.4 | 12.5 | 12.7   | 7.64 | 1.54   | 0.21 | 0.41 |
| HX19        | HSW      | 12.2 | 48.4 | 37.1 | 36.8   | 26.9 | 4.54   | 0.60 | 1.21 |

|      |     |      |      |      |      |      |      |      |      |
|------|-----|------|------|------|------|------|------|------|------|
| JH18 | EL  | 7.54 | 21.2 | 17.4 | 17.4 | 14.6 | 1.31 | 0.17 | 0.35 |
| JH18 | GY  | 10.8 | 13.7 | 10.7 | 10.6 | 8.26 | 1.16 | 0.15 | 0.31 |
| JH18 | HSW | 11.6 | 40.3 | 32.9 | 33.1 | 23.6 | 3.81 | 0.51 | 1.01 |
| JH19 | EL  | 7.81 | 21.6 | 17.5 | 17.4 | 14.2 | 1.37 | 0.18 | 0.36 |
| JH19 | GY  | 12.7 | 15   | 11.1 | 11.1 | 8.22 | 1.40 | 0.19 | 0.37 |
| JH19 | HSW | 12.3 | 44.1 | 35.2 | 35.1 | 25.9 | 4.34 | 0.57 | 1.15 |
| JS18 | EL  | 7.59 | 20.2 | 17.4 | 17.4 | 15   | 1.32 | 0.18 | 0.35 |
| JS18 | GY  | 10   | 14.3 | 11.8 | 11.8 | 9.33 | 1.18 | 0.16 | 0.31 |
| JS18 | HSW | 15.9 | 42.4 | 33.2 | 33.6 | 20.2 | 5.28 | 0.70 | 1.40 |
| JS19 | EL  | 7.78 | 19.9 | 17.3 | 17.4 | 14.4 | 1.34 | 0.18 | 0.36 |
| JS19 | GY  | 10   | 14.9 | 12.3 | 12.2 | 9.72 | 1.23 | 0.16 | 0.33 |
| JS19 | HSW | 17   | 46.5 | 35.5 | 36.2 | 22.1 | 6.02 | 0.80 | 1.60 |
| JZ18 | EL  | 5.04 | 22.2 | 19.8 | 19.7 | 17.7 | 1.00 | 0.13 | 0.26 |
| JZ18 | GY  | 9.41 | 13.3 | 11.3 | 11.3 | 8.59 | 1.07 | 0.14 | 0.28 |
| JZ18 | HSW | 10.7 | 43.1 | 34.4 | 34.1 | 26.8 | 3.68 | 0.49 | 0.98 |
| JZ19 | EL  | 5.17 | 21.7 | 19.3 | 19.2 | 17.2 | 1.00 | 0.13 | 0.26 |
| JZ19 | GY  | 11.3 | 14.3 | 11.7 | 11.7 | 8.59 | 1.33 | 0.18 | 0.35 |
| JZ19 | HSW | 12.3 | 47.3 | 36.8 | 37   | 27.9 | 4.52 | 0.60 | 1.20 |
| LY18 | EL  | 6.55 | 22.2 | 18.9 | 18.9 | 15.8 | 1.24 | 0.16 | 0.33 |
| LY18 | GY  | 8.53 | 15.7 | 13.4 | 13.4 | 11.1 | 1.15 | 0.15 | 0.30 |
| LY18 | HSW | 9.33 | 44.9 | 37.8 | 37.3 | 28.7 | 3.52 | 0.47 | 0.94 |
| LY19 | EL  | 7.85 | 22   | 18.8 | 19   | 15.2 | 1.47 | 0.20 | 0.39 |
| LY19 | GY  | 11.8 | 17.2 | 13.9 | 14.1 | 10.6 | 1.64 | 0.22 | 0.44 |
| LY19 | HSW | 10.4 | 48.5 | 40.3 | 40.5 | 31.4 | 4.21 | 0.56 | 1.12 |
| LZ18 | EL  | 8.94 | 18.8 | 16.2 | 16.1 | 12.8 | 1.45 | 0.19 | 0.39 |
| LZ18 | GY  | 11.1 | 12.4 | 10.2 | 10.2 | 7.95 | 1.13 | 0.15 | 0.30 |
| LZ18 | HSW | 13.4 | 39.1 | 32   | 32.8 | 22   | 4.31 | 0.57 | 1.14 |
| LZ19 | EL  | 10.2 | 19.5 | 16.1 | 16.2 | 12.4 | 1.63 | 0.22 | 0.43 |
| LZ19 | GY  | 13.5 | 13.6 | 10.6 | 10.4 | 7.74 | 1.43 | 0.19 | 0.38 |
| LZ19 | HSW | 14.7 | 42.9 | 34.2 | 34.9 | 22.8 | 5.01 | 0.66 | 1.33 |
| MC18 | EL  | 7.18 | 20.5 | 17   | 16.8 | 14.9 | 1.22 | 0.16 | 0.32 |
| MC18 | GY  | 12.1 | 8.52 | 6.89 | 6.87 | 4.87 | 0.83 | 0.11 | 0.22 |
| MC18 | HSW | 13.5 | 43.1 | 31.7 | 31.3 | 23.3 | 4.27 | 0.57 | 1.13 |
| MC19 | EL  | 9.19 | 20.3 | 16.9 | 16.7 | 14.3 | 1.55 | 0.21 | 0.41 |
| MC19 | GY  | 12   | 8.88 | 7.1  | 7.13 | 5.08 | 0.85 | 0.11 | 0.23 |
| MC19 | HSW | 15.8 | 47   | 33.9 | 33.6 | 21.6 | 5.35 | 0.71 | 1.42 |
| MJ18 | EL  | 9.41 | 19.1 | 16.4 | 16.4 | 13   | 1.55 | 0.21 | 0.41 |
| MJ18 | GY  | 8.65 | 12.2 | 10.3 | 10.2 | 8.13 | 0.89 | 0.12 | 0.24 |
| MJ18 | HSW | 7.5  | 41.7 | 36.5 | 36.4 | 31.2 | 2.74 | 0.36 | 0.73 |
| MJ19 | EL  | 11.4 | 20.4 | 16.3 | 16   | 13.2 | 1.86 | 0.25 | 0.49 |
| MJ19 | GY  | 11.4 | 13.3 | 10.6 | 10.5 | 7.87 | 1.22 | 0.16 | 0.32 |
| MJ19 | HSW | 9.65 | 45.7 | 39   | 39.1 | 31   | 3.76 | 0.50 | 1.00 |
| MZ18 | EL  | 5.75 | 19.7 | 18   | 18.3 | 15.8 | 1.04 | 0.14 | 0.28 |
| MZ18 | GY  | 13.9 | 12.9 | 10.1 | 10.1 | 6.71 | 1.40 | 0.19 | 0.37 |
| MZ18 | HSW | 9.09 | 42.3 | 34.9 | 34.6 | 27.2 | 3.18 | 0.42 | 0.84 |
| MZ19 | EL  | 5.93 | 20.8 | 17.8 | 17.9 | 15.5 | 1.06 | 0.14 | 0.28 |
| MZ19 | GY  | 15.1 | 13   | 10.4 | 10.6 | 6.83 | 1.57 | 0.21 | 0.42 |
| MZ19 | HSW | 9.71 | 46.3 | 37.3 | 36.9 | 29.8 | 3.62 | 0.48 | 0.96 |
| NH18 | EL  | 5.26 | 21.5 | 19.8 | 19.7 | 17.6 | 1.04 | 0.14 | 0.28 |
| NH18 | GY  | 9.04 | 15   | 12.6 | 12.6 | 10.2 | 1.14 | 0.15 | 0.30 |
| NH18 | HSW | 10.8 | 44.1 | 35.8 | 36.3 | 24.7 | 3.88 | 0.51 | 1.03 |
| NH19 | EL  | 6.27 | 22   | 19.9 | 20   | 17.4 | 1.25 | 0.17 | 0.33 |
| NH19 | GY  | 9.03 | 13.3 | 11.3 | 11.2 | 9.06 | 1.02 | 0.14 | 0.27 |
| NH19 | HSW | 10.5 | 48   | 38.2 | 38.2 | 27.1 | 4.03 | 0.53 | 1.07 |
| NJ18 | EL  | 6.01 | 22.3 | 20.1 | 20.3 | 17.3 | 1.21 | 0.16 | 0.32 |
| NJ18 | GY  | 9.14 | 12.6 | 10.6 | 10.6 | 8.33 | 0.97 | 0.13 | 0.26 |

|      |     |      |      |      |      |      |      |      |      |
|------|-----|------|------|------|------|------|------|------|------|
| NJ18 | HSW | 9.46 | 46.9 | 40.2 | 40.1 | 32   | 3.80 | 0.50 | 1.01 |
| NJ19 | EL  | 6.76 | 23.6 | 19.9 | 19.8 | 17.1 | 1.35 | 0.18 | 0.36 |
| NJ19 | GY  | 9.46 | 11.6 | 9.53 | 9.46 | 7.4  | 0.90 | 0.12 | 0.24 |
| NJ19 | HSW | 10.9 | 51.3 | 42.9 | 42.8 | 33   | 4.69 | 0.62 | 1.24 |
| QS18 | EL  | 5.14 | 20.1 | 17.8 | 17.7 | 16.1 | 0.92 | 0.12 | 0.24 |
| QS18 | GY  | 8.69 | 12.8 | 11.1 | 10.9 | 9.22 | 0.96 | 0.13 | 0.26 |
| QS18 | HSW | 12.6 | 41.3 | 33.1 | 33.7 | 26   | 4.17 | 0.55 | 1.11 |
| QS19 | EL  | 7.91 | 20.6 | 17.7 | 17.4 | 15.4 | 1.40 | 0.19 | 0.37 |
| QS19 | GY  | 8.69 | 11.7 | 10.1 | 9.92 | 8.41 | 0.88 | 0.12 | 0.23 |
| QS19 | HSW | 13.8 | 45   | 35.3 | 35.7 | 26.4 | 4.87 | 0.65 | 1.29 |
| QX18 | EL  | 5.95 | 21.5 | 18.7 | 18.6 | 16.3 | 1.11 | 0.15 | 0.30 |
| QX18 | GY  | 7.92 | 13.8 | 12   | 12.1 | 10.3 | 0.95 | 0.13 | 0.25 |
| QX18 | HSW | 9.65 | 40.6 | 32.1 | 31.6 | 26.3 | 3.10 | 0.41 | 0.82 |
| QX19 | EL  | 6.64 | 21.9 | 18.5 | 18.4 | 16.6 | 1.23 | 0.16 | 0.33 |
| QX19 | GY  | 7.93 | 15.3 | 13.3 | 13.4 | 11.3 | 1.05 | 0.14 | 0.28 |
| QX19 | HSW | 11.1 | 44.4 | 34.3 | 34.2 | 26.5 | 3.80 | 0.50 | 1.01 |
| QZ18 | EL  | 7.7  | 21.8 | 18.8 | 18.7 | 15.5 | 1.44 | 0.19 | 0.38 |
| QZ18 | GY  | 16.7 | 13.7 | 10.6 | 10.9 | 5.93 | 1.77 | 0.23 | 0.47 |
| QZ18 | HSW | 15.6 | 44.4 | 34.4 | 34.7 | 21.5 | 5.37 | 0.71 | 1.43 |
| QZ19 | EL  | 8.7  | 22.6 | 18.6 | 18.2 | 16.1 | 1.62 | 0.22 | 0.43 |
| QZ19 | GY  | 18   | 14.4 | 11   | 11.3 | 6.03 | 1.98 | 0.26 | 0.53 |
| QZ19 | HSW | 16.2 | 47.9 | 36.8 | 36.6 | 23.6 | 5.95 | 0.79 | 1.58 |
| SP18 | EL  | 9.91 | 20.6 | 17.2 | 17.1 | 12.7 | 1.71 | 0.23 | 0.45 |
| SP18 | GY  | 9.48 | 11.6 | 9.63 | 9.66 | 7.64 | 0.91 | 0.12 | 0.24 |
| SP18 | HSW | 8.57 | 40.5 | 35.1 | 35.2 | 26.1 | 3.00 | 0.40 | 0.80 |
| SP19 | EL  | 10.3 | 20.1 | 16.7 | 16.6 | 12.2 | 1.72 | 0.23 | 0.46 |
| SP19 | GY  | 11.3 | 12.1 | 9.98 | 9.99 | 7.4  | 1.13 | 0.15 | 0.30 |
| SP19 | HSW | 10.3 | 44.3 | 37.5 | 38.3 | 28.6 | 3.87 | 0.51 | 1.03 |
| SS18 | EL  | 5.61 | 19.8 | 17.6 | 17.8 | 15.1 | 0.99 | 0.13 | 0.26 |
| SS18 | GY  | 10.3 | 11.3 | 9.68 | 9.59 | 6.83 | 1.00 | 0.13 | 0.26 |
| SS18 | HSW | 16.5 | 37   | 29.4 | 30.3 | 13.6 | 4.84 | 0.64 | 1.28 |
| SS19 | EL  | 5.25 | 19.5 | 17.4 | 17.4 | 15.4 | 0.92 | 0.12 | 0.24 |
| SS19 | GY  | 13   | 12.4 | 10   | 10   | 6.95 | 1.31 | 0.17 | 0.35 |
| SS19 | HSW | 17.4 | 40.5 | 31.4 | 31.6 | 14.8 | 5.46 | 0.72 | 1.45 |
| SX18 | EL  | 9.65 | 23.7 | 18.5 | 17.9 | 15.9 | 1.78 | 0.24 | 0.47 |
| SX18 | GY  | 9.88 | 13.2 | 11.1 | 11.2 | 8.07 | 1.10 | 0.15 | 0.29 |
| SX18 | HSW | 13   | 35.4 | 29.7 | 30.3 | 21.5 | 3.85 | 0.51 | 1.02 |
| SX19 | EL  | 11.5 | 25.3 | 18.3 | 17.8 | 15.6 | 2.11 | 0.28 | 0.56 |
| SX19 | GY  | 9.87 | 13.7 | 11.6 | 11.6 | 8.41 | 1.14 | 0.15 | 0.30 |
| SX19 | HSW | 14.1 | 38.7 | 31.7 | 32.5 | 23.1 | 4.47 | 0.59 | 1.18 |
| SY18 | EL  | 10.8 | 21.2 | 17.3 | 17.6 | 14.1 | 1.87 | 0.25 | 0.50 |
| SY18 | GY  | 10.1 | 12.7 | 10.1 | 10   | 8.06 | 1.03 | 0.14 | 0.27 |
| SY18 | HSW | 10.4 | 42.7 | 35.9 | 35.5 | 28.2 | 3.75 | 0.50 | 0.99 |
| SY19 | EL  | 11.9 | 22   | 17.1 | 17.3 | 13.5 | 2.04 | 0.27 | 0.54 |
| SY19 | GY  | 11.4 | 13   | 10.5 | 10.4 | 8.19 | 1.19 | 0.16 | 0.32 |
| SY19 | HSW | 11.8 | 46.9 | 38.3 | 38.2 | 30.9 | 4.53 | 0.60 | 1.20 |
| SZ18 | EL  | 4.72 | 21.2 | 19.1 | 19   | 16.9 | 0.90 | 0.12 | 0.24 |
| SZ18 | GY  | 9    | 12.4 | 10.5 | 10.5 | 8.5  | 0.95 | 0.13 | 0.25 |
| SZ18 | HSW | 9.52 | 41.8 | 34.1 | 34.1 | 27.4 | 3.24 | 0.43 | 0.86 |
| SZ19 | EL  | 4.93 | 20.7 | 18.6 | 18.5 | 16.4 | 0.92 | 0.12 | 0.24 |
| SZ19 | GY  | 9    | 11.3 | 9.59 | 9.55 | 7.75 | 0.86 | 0.11 | 0.23 |
| SZ19 | HSW | 11.2 | 45.8 | 36.4 | 36.6 | 28.8 | 4.07 | 0.54 | 1.08 |
| WY18 | EL  | 9.45 | 21.5 | 16.8 | 16.6 | 13.8 | 1.59 | 0.21 | 0.42 |
| WY18 | GY  | 11.6 | 10.4 | 8.35 | 8.31 | 6.15 | 0.97 | 0.13 | 0.26 |
| WY18 | HSW | 9.78 | 34.9 | 28.4 | 28.1 | 23.1 | 2.78 | 0.37 | 0.74 |
| WY19 | EL  | 10.1 | 21.9 | 16.9 | 16.7 | 13.9 | 1.70 | 0.23 | 0.45 |

|      |     |      |      |      |      |      |      |      |      |
|------|-----|------|------|------|------|------|------|------|------|
| WY19 | GY  | 12.4 | 10.9 | 8.64 | 8.68 | 6.26 | 1.08 | 0.14 | 0.29 |
| WY19 | HSW | 12.5 | 38.3 | 30.4 | 30.5 | 21.5 | 3.80 | 0.50 | 1.01 |
| XH18 | EL  | 7.08 | 20   | 17.1 | 16.8 | 14.5 | 1.21 | 0.16 | 0.32 |
| XH18 | GY  | 7.98 | 9.12 | 7.94 | 7.95 | 6.74 | 0.63 | 0.08 | 0.17 |
| XH18 | HSW | 10.8 | 34.1 | 28.1 | 28.1 | 20.7 | 3.04 | 0.40 | 0.81 |
| XH19 | EL  | 7.19 | 20.1 | 16.9 | 16.8 | 14.9 | 1.22 | 0.16 | 0.32 |
| XH19 | GY  | 7.95 | 8.17 | 7.12 | 7.13 | 6.04 | 0.57 | 0.08 | 0.15 |
| XH19 | HSW | 12.4 | 37.3 | 30   | 30.1 | 19.1 | 3.73 | 0.49 | 0.99 |
| XJ18 | EL  | 8.15 | 24.1 | 20.1 | 20   | 16.4 | 1.64 | 0.22 | 0.44 |
| XJ18 | GY  | 8.02 | 11   | 9.41 | 9.34 | 8.06 | 0.75 | 0.10 | 0.20 |
| XJ18 | HSW | 13.9 | 40.1 | 31.8 | 32.1 | 23.2 | 4.41 | 0.58 | 1.17 |
| XJ19 | EL  | 7.46 | 23.1 | 19.9 | 19.8 | 17.2 | 1.49 | 0.20 | 0.40 |
| XJ19 | GY  | 8.02 | 9.89 | 8.43 | 8.37 | 7.22 | 0.68 | 0.09 | 0.18 |
| XJ19 | HSW | 15.5 | 43.7 | 34   | 33.8 | 21.5 | 5.28 | 0.70 | 1.40 |
| XT18 | EL  | 6.59 | 22.7 | 19.5 | 19.3 | 17   | 1.29 | 0.17 | 0.34 |
| XT18 | GY  | 10.5 | 13.4 | 10.6 | 10.4 | 8.22 | 1.11 | 0.15 | 0.30 |
| XT18 | HSW | 16.5 | 46.9 | 34.4 | 34.7 | 20.1 | 5.68 | 0.75 | 1.51 |
| XT19 | EL  | 7.08 | 23.7 | 19.4 | 19   | 17.2 | 1.37 | 0.18 | 0.36 |
| XT19 | GY  | 12.9 | 14.7 | 11   | 10.8 | 8.01 | 1.41 | 0.19 | 0.38 |
| XT19 | HSW | 17   | 51.3 | 36.7 | 37.2 | 21.9 | 6.26 | 0.83 | 1.66 |
| XY18 | EL  | 8.41 | 22   | 19.1 | 19   | 16   | 1.60 | 0.21 | 0.43 |
| XY18 | GY  | 9.84 | 14.9 | 12   | 12   | 9.05 | 1.18 | 0.16 | 0.31 |
| XY18 | HSW | 13   | 49.8 | 36.9 | 37.6 | 25.5 | 4.79 | 0.63 | 1.27 |
| XY19 | EL  | 9.24 | 23.5 | 18.9 | 18.8 | 15.4 | 1.75 | 0.23 | 0.46 |
| XY19 | GY  | 11.2 | 15.2 | 12.5 | 12.5 | 9.71 | 1.39 | 0.19 | 0.37 |
| XY19 | HSW | 14.4 | 54.5 | 39.5 | 39.8 | 27.9 | 5.70 | 0.76 | 1.51 |
| XZ18 | EL  | 7.49 | 21.7 | 18.4 | 18.3 | 15.2 | 1.38 | 0.18 | 0.37 |
| XZ18 | GY  | 8.44 | 13.1 | 11.3 | 11.2 | 9.43 | 0.96 | 0.13 | 0.25 |
| XZ18 | HSW | 13.6 | 45.3 | 36.6 | 37.4 | 26.7 | 4.97 | 0.66 | 1.32 |
| XZ19 | EL  | 7.33 | 20.8 | 18.3 | 18.3 | 14.6 | 1.34 | 0.18 | 0.36 |
| XZ19 | GY  | 8.45 | 14.4 | 12.5 | 12.3 | 10.4 | 1.05 | 0.14 | 0.28 |
| XZ19 | HSW | 15.1 | 49.6 | 39.2 | 39.1 | 26.6 | 5.92 | 0.78 | 1.57 |
| YC18 | EL  | 7.81 | 21.4 | 17.9 | 17.7 | 14.7 | 1.40 | 0.19 | 0.37 |
| YC18 | GY  | 7.95 | 9.43 | 8.16 | 8.16 | 6.91 | 0.65 | 0.09 | 0.17 |
| YC18 | HSW | 9.99 | 33.2 | 27.6 | 27.3 | 22.4 | 2.76 | 0.37 | 0.73 |
| YC19 | EL  | 7.14 | 21.5 | 17.7 | 17.5 | 15.7 | 1.26 | 0.17 | 0.34 |
| YC19 | GY  | 8.28 | 10.3 | 8.87 | 8.86 | 7.5  | 0.73 | 0.10 | 0.20 |
| YC19 | HSW | 12.5 | 36.4 | 29.5 | 29.8 | 21.6 | 3.69 | 0.49 | 0.98 |
| YI18 | EL  | 6.58 | 20.7 | 18.4 | 18.4 | 15.2 | 1.21 | 0.16 | 0.32 |
| YI18 | GY  | 9.55 | 9.76 | 8.41 | 8.26 | 6.69 | 0.80 | 0.11 | 0.21 |
| YI18 | HSW | 15.4 | 41.1 | 32.3 | 33   | 20.8 | 5.00 | 0.66 | 1.33 |
| YI19 | EL  | 6.62 | 20.8 | 18.2 | 18.5 | 15.5 | 1.21 | 0.16 | 0.32 |
| YI19 | GY  | 9.75 | 10.6 | 9.13 | 9.02 | 7.31 | 0.89 | 0.12 | 0.24 |
| YI19 | HSW | 16.5 | 45   | 34.6 | 35   | 22.8 | 5.69 | 0.75 | 1.51 |
| YL18 | EL  | 6.91 | 22.6 | 18.8 | 18.5 | 16.8 | 1.30 | 0.17 | 0.35 |
| YL18 | GY  | 10.5 | 13.2 | 10.9 | 10.9 | 8.45 | 1.14 | 0.15 | 0.30 |
| YL18 | HSW | 13.9 | 45.7 | 36.2 | 36.9 | 24.7 | 5.05 | 0.67 | 1.34 |
| YL19 | EL  | 7.99 | 22   | 18.7 | 18.4 | 16.5 | 1.49 | 0.20 | 0.40 |
| YL19 | GY  | 10.4 | 12   | 9.74 | 9.71 | 7.51 | 1.02 | 0.14 | 0.27 |
| YL19 | HSW | 15.8 | 49.8 | 38.8 | 39.5 | 26.4 | 6.11 | 0.81 | 1.62 |
| YY18 | EL  | 4.68 | 20.6 | 18.6 | 18.6 | 16.7 | 0.87 | 0.12 | 0.23 |
| YY18 | GY  | 9.53 | 14.6 | 11.7 | 11.7 | 9    | 1.12 | 0.15 | 0.30 |
| YY18 | HSW | 11.8 | 51.4 | 41.8 | 41.6 | 30.9 | 4.93 | 0.65 | 1.31 |
| YY19 | EL  | 4.9  | 21   | 18.4 | 18.3 | 16.9 | 0.90 | 0.12 | 0.24 |
| YY19 | GY  | 9.54 | 13.3 | 10.7 | 10.6 | 8.21 | 1.02 | 0.14 | 0.27 |
| YY19 | HSW | 12.1 | 55   | 44.7 | 45   | 33.9 | 5.41 | 0.72 | 1.43 |

Variable: agronomic traits; GY: grain yield; EL: ear length; HSW: hundred seed weight; CV: coefficient of variation; Max: maximum value; Min: minimum value; Mean: arithmetic mean; Sd.amo: the sample standard deviation; SE: the standard error of the mean; CI: 95 percent confidence interval of the mean; Please refer to the Table S2 for the environment name referred to by the environment code.
