# Supplementary material
Source: MDPI journal article supplement (https://www.mdpi.com/2077-0472/12/5/602)
Supplement: s1 [file s1]

**Table S1.** Details of evaluated maize genotypes and their parentages used in this study.

| Genotype number | Genotype code         | Genotypes      | Parentage           | Breeding institute                                                            |
|-----------------|-----------------------|----------------|---------------------|-------------------------------------------------------------------------------|
| 1               | D9                    | Denghai 9      | DH65232/8723        | Laizhou Academy of Agricultural Sciences                                      |
| 2               | Y23                   | Yuyu 23        | 478/C7-2            | Anyang Academy of Agricultural Sciences                                       |
| 3               | L5                    | Lianchuang 5   | CT07/Lx9801         | Henan Ketai Seed Industry Co., Ltd.                                           |
| 4               | N988                  | Nongle 988     | NL278/NL167         | Xinxiang Seed Company                                                         |
| 5               | N101                  | Nonghua 101    | NH60/S121           | Beijing Golden Nonghua Seed Industry Technology Co., Ltd.                     |
| 6               | D605                  | Denghai 605    | DH351/DH382         | Denghai Seed Industry Co., Ltd.                                               |
| 7               | D618                  | Denghai 618    | 521×DH392           | Denghai Seed Industry Co., Ltd.                                               |
| 8               | H168                  | Huayu 168      | HF2458-1/MC712-2111 | Henan Huafeng Seed Industry Technology Co., Ltd.                              |
| 9               | H321                  | Hengyu 321     | H14/H13             | Dryland Farming Institute, Hebei Academy of Agriculture and Forestry Sciences |
| 10              | H9                    | Heng 9         | H1027×H765          | Dryland Farming Institute, Hebei Academy of Agriculture and Forestry Sciences |
| 11              | H110                  | Heng 110       | H58/H59             | Dryland Farming Institute, Hebei Academy of Agriculture and Forestry Sciences |
| 12              | Y303                  | Yufeng 303     | CT1669/CT3354       | Beijing Lianchuang Seed Industry Co., Ltd.                                    |
| 13              | L808                  | Lianchuang 808 | CT3566/CT3354       | Beijing Lianchuang Seed Industry Co., Ltd.                                    |
| 14              | X335                  | Xianyu 335     | PH6WC/PH4CV         | Tieling Pioneer Seed Research Co., Ltd.                                       |
| 15              | Q218                  | Qiule 218      | NK05/NK07           | Henan Qiule Seed Industry Technology Co., Ltd.                                |
| 16              | X20                   | Xundan 20      | 9058/X92-8          | Hebi Academy of Agricultural Sciences                                         |
| 17              | W702                  | Weike 702      | WK858/WK798-2       | Zhengzhou Weike Crop Breeding Technology Co., Ltd.                            |
| 18              | L206                  | Longping 206   | L239/L7221          | Anhui Longping Hi-Tech Seed Industry Co., Ltd.                                |
| 19              | Z958 (check genotype) | Zhengdan 958   | Z58/C7-2            | Henan Academy of Agriculture and Forestry Sciences                            |

**Table S2.** Description of agro-climatic characteristics of environments used in the study during 2018-2019.

| Environment code | Longitude | Latitude | Locations | Province | Average annual temperature (°C) | Altitude (m) | Average annual rainfall (mm) |
|------------------|-----------|----------|-----------|----------|---------------------------------|--------------|------------------------------|
| SP18, SP19       | 115°04'   | 38°52'   | Shunping  | Hebei    | 12.7                            | 75           | 452                          |
| GC18, GC19       | 114°85'   | 38°02'   | Gaocheng  | Hebei    | 12.8                            | 52           | 446                          |
| HD18, HD19       | 114°54'   | 36°63'   | Handan    | Hebei    | 13.5                            | 55           | 415                          |
| JZ18, JZ19       | 114°75'   | 37°03'   | Jize      | Hebei    | 13.1                            | 38           | 490                          |
| JH18, JH18       | 115°14'   | 37°55'   | Jinzhou   | Hebei    | 13.9                            | 35           | 412                          |
| BT18, BT19       | 115°91'   | 38°09'   | Botou     | Hebei    | 13.6                            | 15           | 543                          |
| SZ18, SZ19       | 115°56'   | 38°01'   | Shen Zhou | Hebei    | 13.4                            | 25           | 486                          |
| WY18, WY19       | 115°96'   | 37°89'   | Wuyi      | Hebei    | 12.6                            | 20           | 518                          |
| NH18, NH19       | 114°90'   | 35°81'   | Neihuang  | Henan    | 13.7                            | 65           | 596                          |
| QX18, QX19       | 114°82'   | 34°52'   | Qixian    | Henan    | 16.8                            | 83           | 615                          |
| HX18, HX19       | 113°80'   | 35°46'   | Huixian   | Henan    | 14.8                            | 126          | 592                          |
| LY18, LY19       | 113°93'   | 33°83'   | Linying   | Henan    | 14.6                            | 64           | 725                          |
| MJ18, MJ19       | 112°50'   | 34°85'   | Mengjin   | Henan    | 13.9                            | 262          | 650                          |
| MZ18, MZ19       | 112°79'   | 34°91'   | Mengzhou  | Henan    | 14.2                            | 112          | 588                          |
| FC18, FC19       | 112°99'   | 33°18'   | Fangcheng | Henan    | 14.5                            | 128          | 805                          |
| SY18, SY19       | 115°56'   | 34°43'   | Suiyang   | Henan    | 13.9                            | 26           | 826                          |
| XH18, XH19       | 114°53'   | 33°76'   | Xihua     | Henan    | 14.2                            | 30           | 860                          |
| YY18, YY19       | 113°97'   | 35°05'   | Yuanyang  | Henan    | 14.3                            | 45           | 882                          |
| XY18, XY19       | 113°38'   | 34°79'   | Xingyang  | Henan    | 14.4                            | 28           | 606                          |
| NJ18, NJ19       | 116°78'   | 37°69'   | Ningjin   | Shandong | 12.5                            | 42           | 521                          |
| HT18, HT19       | 119°16'   | 36°71'   | Hanting   | Shandong | 12.1                            | 22           | 602                          |
| YC18, YC19       | 115°95'   | 35°54'   | Yuncheng  | Shandong | 13.5                            | 34           | 694                          |
| SS18, SS19       | 116°54'   | 35°37'   | Sishui    | Shandong | 13.4                            | 120          | 755                          |
| LZ18, LZ19       | 119°95'   | 37°17'   | Laizhou   | Shandong | 12.8                            | 18           | 804                          |
| GX18, GX19       | 115°99'   | 36°46'   | Guanxian  | Shandong | 13.1                            | 46           | 576                          |
| XT18, XT19       | 117°76'   | 35°88'   | Xintai    | Shandong | 13.6                            | 136          | 730                          |
| QZ18, QZ19       | 118°46'   | 36°61'   | Qingzhou  | Shandong | 12.7                            | 36           | 664                          |
| XJ18, XJ19       | 111°20'   | 35°55'   | Xinjiang  | Shanxi   | 13.8                            | 408          | 505                          |
| QS18, QS19       | 111°15'   | 35°70'   | Qinshui   | Shanxi   | 10.3                            | 246          | 452                          |
| FP18, FP19       | 109°30'   | 34°81'   | Fuping    | Shaanxi  | 10.1                            | 622          | 426                          |
| YL18, YL19       | 108°08'   | 34°27'   | Yangling  | Shaanxi  | 12.9                            | 421          | 635                          |
| XZ18, XZ19       | 112°12'   | 32°01'   | Xiangzhou | Hubei    | 15.8                            | 125          | 878                          |
| YI18, YI19       | 112°30'   | 31°67'   | Yicheng   | Hubei    | 16.2                            | 42           | 920                          |
| FX18, FX19       | 116°55'   | 34°61'   | Fengxian  | Jiangsu  | 15.8                            | 36           | 640                          |
| JS18, JS19       | 115°37'   | 33°25'   | Jieshou   | Anhui    | 14.7                            | 35           | 790                          |
| SX18, SX19       | 116°73'   | 33°79'   | Suixi     | Anhui    | 15.2                            | 26           | 810                          |
| MC18, MC19       | 116°77'   | 33°21'   | Mengcheng | Anhui    | 14.8                            | 28           | 732                          |

**Table S3.** Predictive accuracy of AMMI model and BLUP by RMSPD estimates for grain yield.

| Model | Mean | S. D   | S. E   | Q2.5  | Q97.5 |
|-------|------|--------|--------|-------|-------|
| BLUP  | 1.06 | 0.0988 | 0.0442 | 0.917 | 1.16  |
| AMMIF | 1.14 | 0.0258 | 0.0115 | 1.11  | 1.18  |
| AMMI7 | 1.15 | 0.0307 | 0.0137 | 1.11  | 1.18  |
| AMMI6 | 1.17 | 0.0189 | 0.0085 | 1.15  | 1.19  |
| AMMI2 | 1.19 | 0.0579 | 0.0259 | 1.11  | 1.25  |
| AMMI5 | 1.19 | 0.0183 | 0.0082 | 1.17  | 1.21  |
| AMMI4 | 1.19 | 0.0403 | 0.018  | 1.14  | 1.23  |
| AMMI3 | 1.19 | 0.0554 | 0.0248 | 1.12  | 1.26  |
| AMMI1 | 1.28 | 0.019  | 0.0085 | 1.26  | 1.3   |
| AMMI0 | 1.35 | 0.0331 | 0.0148 | 1.3   | 1.38  |

BLUP, best linear unbiased prediction; RMSPD, root mean square prediction difference; S.D, Standard deviation; S.E, Standard error; Q2.5, percentile 2.5; Q97.5, percentile 97.5. The same as below.

**Table S4.** Predictive accuracy of AMMI model and BLUP by RMSPD estimates for ear length.

| Model | Mean | S.D     | S.E     | Q2.5  | Q97.5 |
|-------|------|---------|---------|-------|-------|
| BLUP  | 0.66 | 0.0182  | 0.0081  | 0.627 | 0.669 |
| AMMIF | 0.77 | 0.0153  | 0.00684 | 0.755 | 0.791 |
| AMMI7 | 0.88 | 0.0197  | 0.009   | 0.854 | 0.899 |
| AMMI6 | 0.92 | 0.0059  | 0.0027  | 0.914 | 0.927 |
| AMMI5 | 0.98 | 0.0189  | 0.0084  | 0.957 | 1.01  |
| AMMI4 | 1.04 | 0.016   | 0.0071  | 1.02  | 1.06  |
| AMMI3 | 1.11 | 0.019   | 0.0085  | 1.08  | 1.13  |
| AMMI2 | 1.17 | 0.0093  | 0.0041  | 1.16  | 1.18  |
| AMMI1 | 1.23 | 0.0083  | 0.0037  | 1.22  | 1.24  |
| AMMI0 | 1.33 | 0.00774 | 0.0035  | 1.32  | 1.34  |

**Table S5.** Predictive accuracy of AMMI model and BLUP by RMSPD estimates for hundred seed weight.

| Model | Mean | S. D  | S. E   | Q2.5 | Q97.5 |
|-------|------|-------|--------|------|-------|
| BLUP  | 4.91 | 0.231 | 0.0163 | 4.5  | 5.3   |
| AMMIF | 4.93 | 0.227 | 0.0161 | 4.49 | 5.39  |
| AMMI7 | 5    | 0.228 | 0.0162 | 4.5  | 5.39  |
| AMMI6 | 5.02 | 0.228 | 0.0161 | 4.5  | 5.43  |
| AMMI5 | 5.08 | 0.221 | 0.0156 | 4.63 | 5.54  |
| AMMI4 | 5.14 | 0.207 | 0.0146 | 4.76 | 5.54  |
| AMMI3 | 5.21 | 0.207 | 0.0146 | 4.78 | 5.56  |
| AMMI2 | 5.28 | 0.195 | 0.0138 | 4.9  | 5.66  |
| AMMI1 | 5.35 | 0.185 | 0.0131 | 4.96 | 5.69  |
| AMMI0 | 5.46 | 0.2   | 0.0142 | 5.05 | 5.83  |

**Table S6.** Predictive value of BLUP genotype effect on grain yield.

| Rank | Genotype | Grain yield(t/ha) | BLUP <sub>g</sub> | Predicted<br>(t/ha) | LL<br>(t/ha) | UL<br>(t/ha) |
|------|----------|-------------------|-------------------|---------------------|--------------|--------------|
| 1    | L808     | 11.3              | 0.652             | 11.2                | 11.1         | 11.3         |
| 2    | L206     | 11.2              | 0.56              | 11.1                | 11           | 11.3         |
| 3    | H9       | 11                | 0.445             | 11                  | 10.9         | 11.1         |
| 4    | Q218     | 11                | 0.432             | 11                  | 10.9         | 11.1         |
| 5    | Y303     | 10.9              | 0.285             | 10.9                | 10.7         | 11           |
| 6    | H110     | 10.8              | 0.214             | 10.8                | 10.7         | 10.9         |
| 7    | H168     | 10.8              | 0.21              | 10.8                | 10.6         | 10.9         |
| 8    | H321     | 10.8              | 0.209             | 10.8                | 10.6         | 10.9         |
| 9    | Y23      | 10.6              | 0.0523            | 10.6                | 10.5         | 10.7         |
| 10   | L5       | 10.6              | 0.0504            | 10.6                | 10.5         | 10.7         |
| 11   | N101     | 10.5              | -0.0382           | 10.5                | 10.4         | 10.7         |
| 12   | Z958     | 10.5              | -0.05             | 10.5                | 10.4         | 10.6         |
| 13   | X335     | 10.5              | -0.103            | 10.5                | 10.3         | 10.6         |
| 14   | N988     | 10.4              | -0.141            | 10.4                | 10.3         | 10.6         |
| 15   | X20      | 10.2              | -0.31             | 10.3                | 10.1         | 10.4         |
| 16   | W702     | 9.98              | -0.554            | 10                  | 9.88         | 10.1         |
| 17   | D605     | 9.98              | -0.555            | 10                  | 9.88         | 10.1         |
| 18   | D9       | 9.93              | -0.601            | 9.96                | 9.83         | 10.1         |
| 19   | D618     | 9.77              | -0.757            | 9.81                | 9.68         | 9.94         |

BLUP<sub>g</sub>, genotypic effect of BLUP; Predicted, predicted mean; LL, lower limit; UL, upper limit.  
The same below.

**Table S7.** Predictive value of BLUP genotype effect on ear length.

| Rank | Genotype | Ear length(cm) | BLUP <sub>g</sub> | Predicted<br>(cm) | LL<br>(cm) | UL<br>(cm) |
|------|----------|----------------|-------------------|-------------------|------------|------------|
| 1    | H9       | 19.5           | 1.31              | 19.5              | 19.3       | 19.6       |
| 2    | H110     | 19.2           | 0.965             | 19.1              | 18.9       | 19.3       |
| 3    | W702     | 19             | 0.791             | 18.9              | 18.7       | 19.1       |
| 4    | D9       | 18.8           | 0.644             | 18.8              | 18.6       | 19         |
| 5    | X20      | 18.7           | 0.539             | 18.7              | 18.5       | 18.9       |
| 6    | Y23      | 18.7           | 0.505             | 18.6              | 18.5       | 18.8       |
| 7    | L206     | 18.6           | 0.394             | 18.5              | 18.3       | 18.7       |
| 8    | N101     | 18.2           | 0.0782            | 18.2              | 18         | 18.4       |
| 9    | N988     | 18.1           | -0.0224           | 18.1              | 17.9       | 18.3       |
| 10   | Q218     | 18.1           | -0.0288           | 18.1              | 17.9       | 18.3       |
| 11   | D618     | 17.9           | -0.224            | 17.9              | 17.7       | 18.1       |
| 12   | D605     | 17.8           | -0.33             | 17.8              | 17.6       | 18         |
| 13   | L5       | 17.7           | -0.457            | 17.7              | 17.5       | 17.9       |
| 14   | L808     | 17.6           | -0.528            | 17.6              | 17.4       | 17.8       |
| 15   | X335     | 17.5           | -0.581            | 17.6              | 17.4       | 17.8       |
| 16   | H321     | 17.4           | -0.669            | 17.5              | 17.3       | 17.7       |
| 17   | H168     | 17.4           | -0.714            | 17.4              | 17.2       | 17.6       |
| 18   | Z958     | 17.3           | -0.789            | 17.4              | 17.2       | 17.5       |
| 19   | Y303     | 17.2           | -0.881            | 17.3              | 17.1       | 17.5       |

**Table S8.** Predictive value of BLUP genotype effect on hundred seed weight.

| Rank | Genotype | Hundred seed weight (g) | BLUP <sub>g</sub> | Predicted<br>(g) | LL<br>(g) | UL<br>(g) |
|------|----------|-------------------------|-------------------|------------------|-----------|-----------|
| 1    | N988     | 37.6                    | 2.39              | 37.6             | 37.1      | 38        |
| 2    | Y303     | 37.5                    | 2.24              | 37.4             | 37        | 37.8      |
| 3    | W702     | 37.1                    | 1.83              | 37               | 36.6      | 37.4      |
| 4    | H110     | 36.3                    | 1.07              | 36.2             | 35.8      | 36.7      |
| 5    | X20      | 36.2                    | 1                 | 36.2             | 35.7      | 36.6      |
| 6    | L808     | 36.1                    | 0.877             | 36               | 35.6      | 36.5      |
| 7    | Z958     | 36                      | 0.841             | 36               | 35.6      | 36.4      |
| 8    | H9       | 35.9                    | 0.754             | 35.9             | 35.5      | 36.4      |
| 9    | H321     | 35.7                    | 0.516             | 35.7             | 35.2      | 36.1      |
| 10   | Q218     | 35.6                    | 0.387             | 35.5             | 35.1      | 36        |
| 11   | L206     | 35.5                    | 0.3               | 35.5             | 35        | 35.9      |
| 12   | D618     | 35.1                    | -0.0839           | 35.1             | 34.6      | 35.5      |
| 13   | X335     | 34.9                    | -0.282            | 34.9             | 34.4      | 35.3      |
| 14   | N101     | 34.5                    | -0.682            | 34.5             | 34        | 34.9      |
| 15   | D605     | 33.8                    | -1.33             | 33.8             | 33.4      | 34.3      |
| 16   | Y23      | 33.5                    | -1.63             | 33.5             | 33.1      | 34        |
| 17   | D9       | 33.4                    | -1.72             | 33.4             | 33        | 33.9      |
| 18   | L5       | 32.7                    | -2.35             | 32.8             | 32.4      | 33.2      |
| 19   | H168     | 30.9                    | -4.14             | 31               | 30.6      | 31.5      |

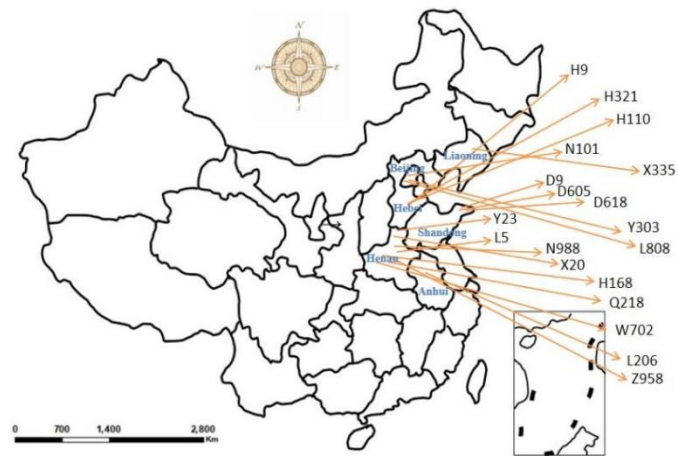

**Figure S1.** The main distribution map of the evaluated genotypes samples in China. The names of maize genotype in this figure were shown in Table S1.

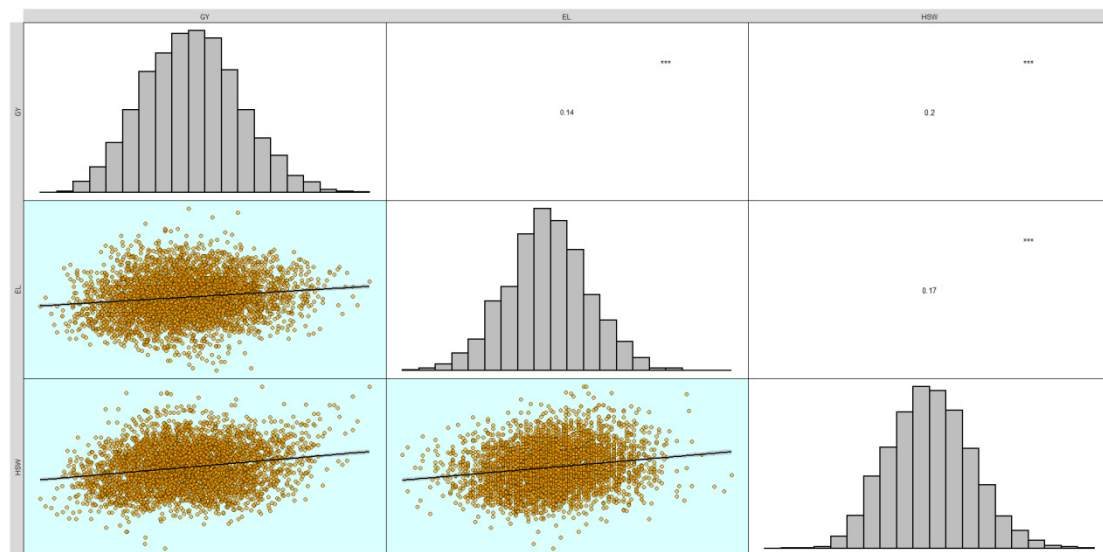

**Figure S2.** The Pearson's correlation between different agronomic traits used in this study. GY, grain yield; EL, ear length; HSW, hundred seed weight.

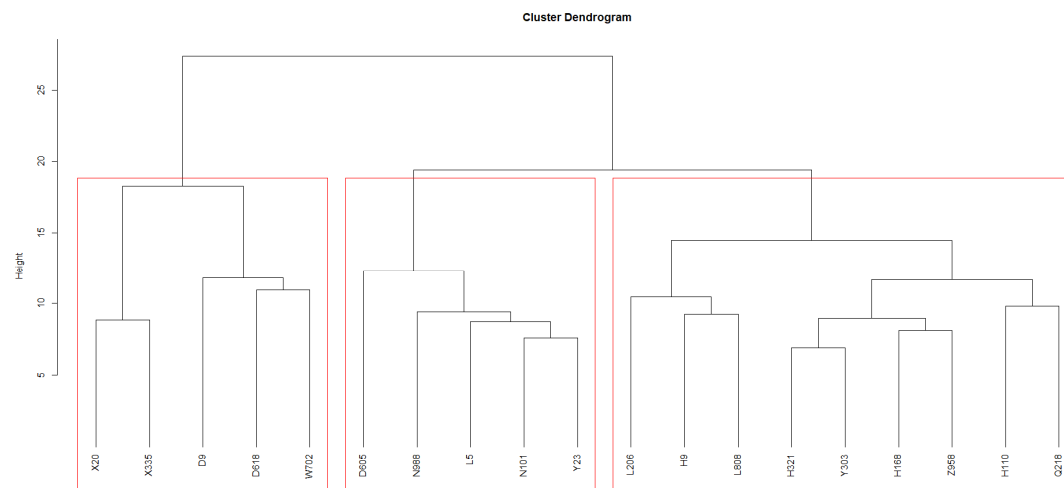

**Figure S3.** Cluster analysis of tested genotypes for grain yield based on a dissimilarity matrix.

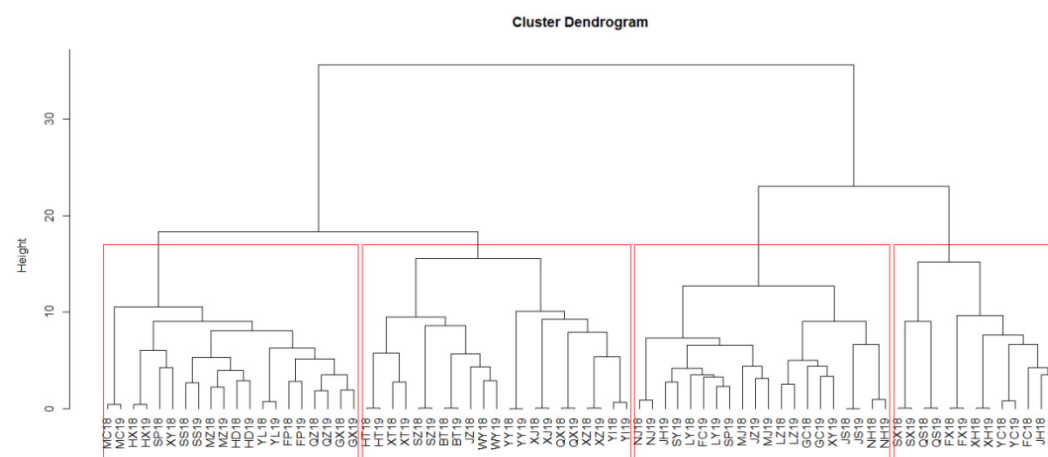

**Figure S4.** Cluster analysis using euclidean distance for grain yield among environments.
